# Supplementary material
Source: HighWire-hosted journal article supplement (https://bmjpaedsopen.bmj.com/content/suppl/2021/06/23/10.1136.bmjpo-2021-001095)

#### Appendix 4. Participant recruitment and flow through study

##### Health professionals

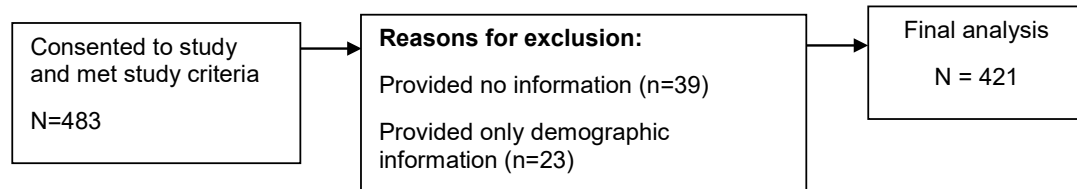

##### Parents

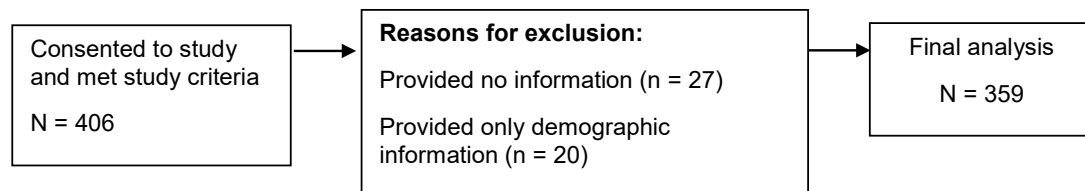

Supplement: bmjpo-2021-001095supp004_data_supplement.pdf [file bmjpo-2021-001095supp004_data_supplement.pdf]
